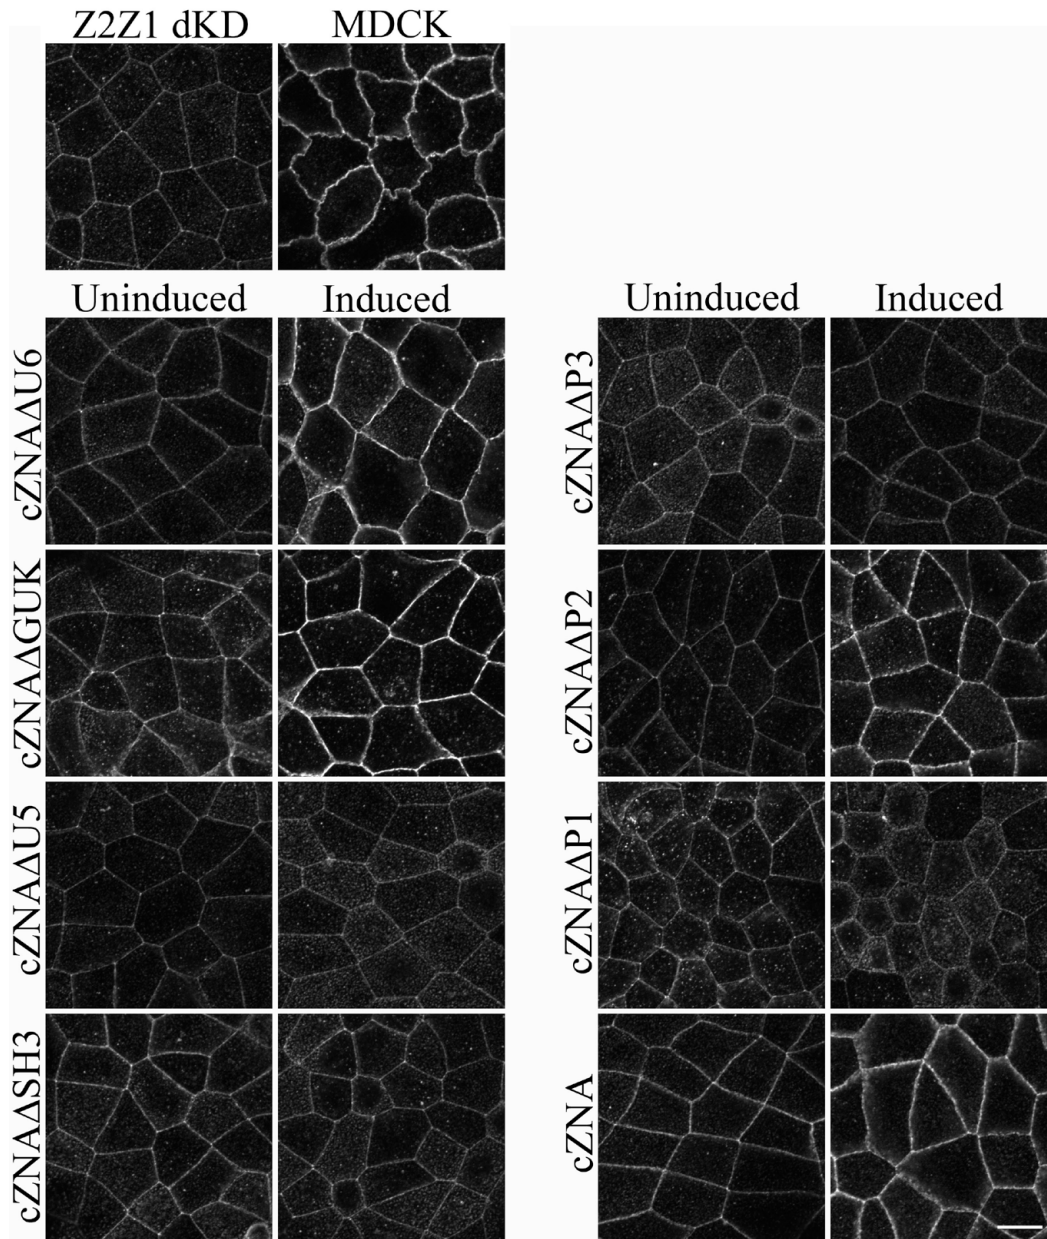

**Fig. S1. PDZ1 and PDZ3 are required for localization of claudin-1 to the AJC.** Induced and uninduced Z2Z1dKD cells were fixed and stained with antibodies against claudin-2. Images are 1.3  $\mu\text{m}$  maximum density projections of Z-stacks taken through the apical most aspect of the cells. Scale bar: 10  $\mu\text{m}$ .

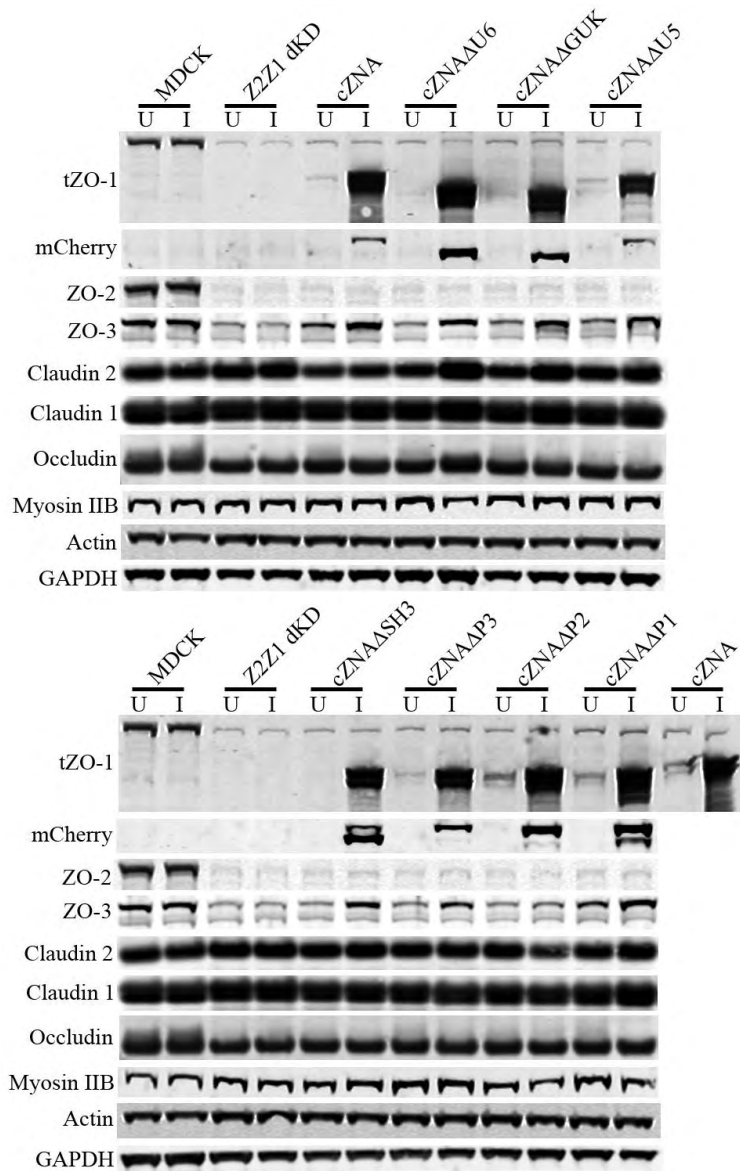

**Fig. S2. Expression of cZNA deletion transgenes and other proteins of interest.** Stoichiometric volumes of uninduced and induced cell lysates were resolved by SDS-PAGE, transferred to nitrocellulose and probed with the indicated antisera as described in the Materials and Methods. U, uninduced; I, induced; ZO1, endogenous ZO1 protein; Cherry, transgene product; GAPDH, loading control.

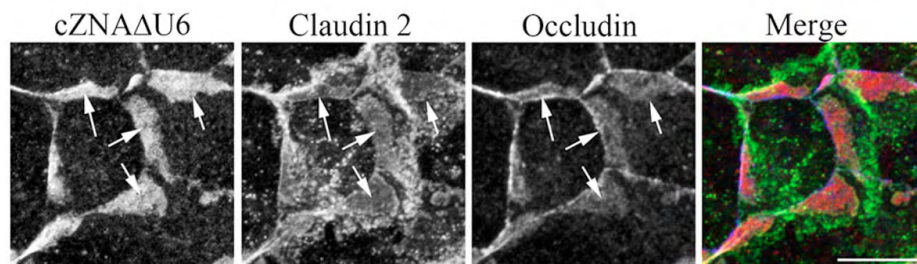

**Fig. S3. Claudin-2 and occludin are colocalized with cZNAΔU6 along the lateral membrane.** Z2Z1dKD cells expressing cZNAΔU6 were fixed and stained with antibodies against the mCherry epitope tag (red), claudin-2 (green) and occludin (blue). Images are maximum density projections of Z-stacks taken through the apical-most aspect of the cells. Arrows indicate areas of lateral membrane colocalization. Scale bar: 10  $\mu$ m.

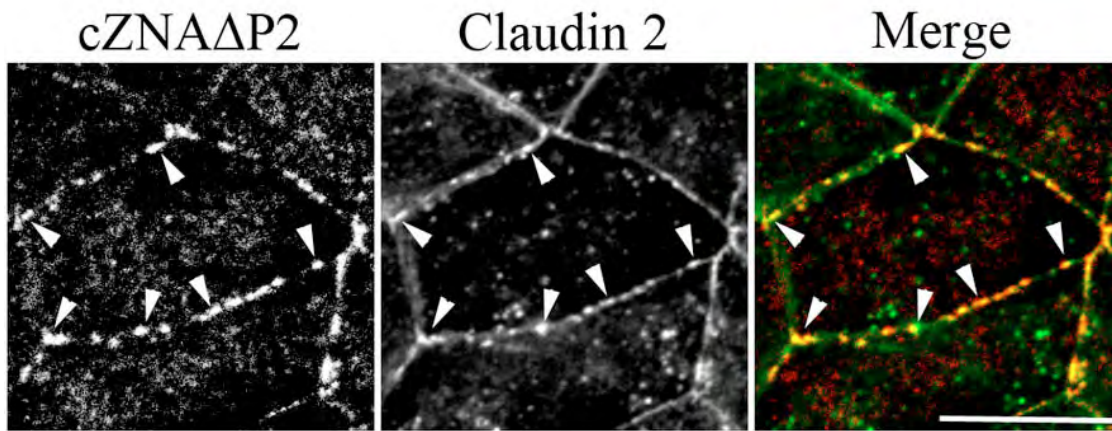

**Fig. S4. Claudin-2 colocalizes with cZNA $\Delta$ P2 in a discontinuous pattern at sights of cell-cell contact.** ZZZ1dKD cells expressing cZNA $\Delta$ P2 were fixed and stained with antibodies against the mCherry epitope tag (red) and claudin-2 (green). Images are 1.3  $\mu$ m maximum density projections of Z-stacks taken through the apical-most aspect of the cells. Arrows indicate areas of co-localization. Scale bar: 10  $\mu$ m.

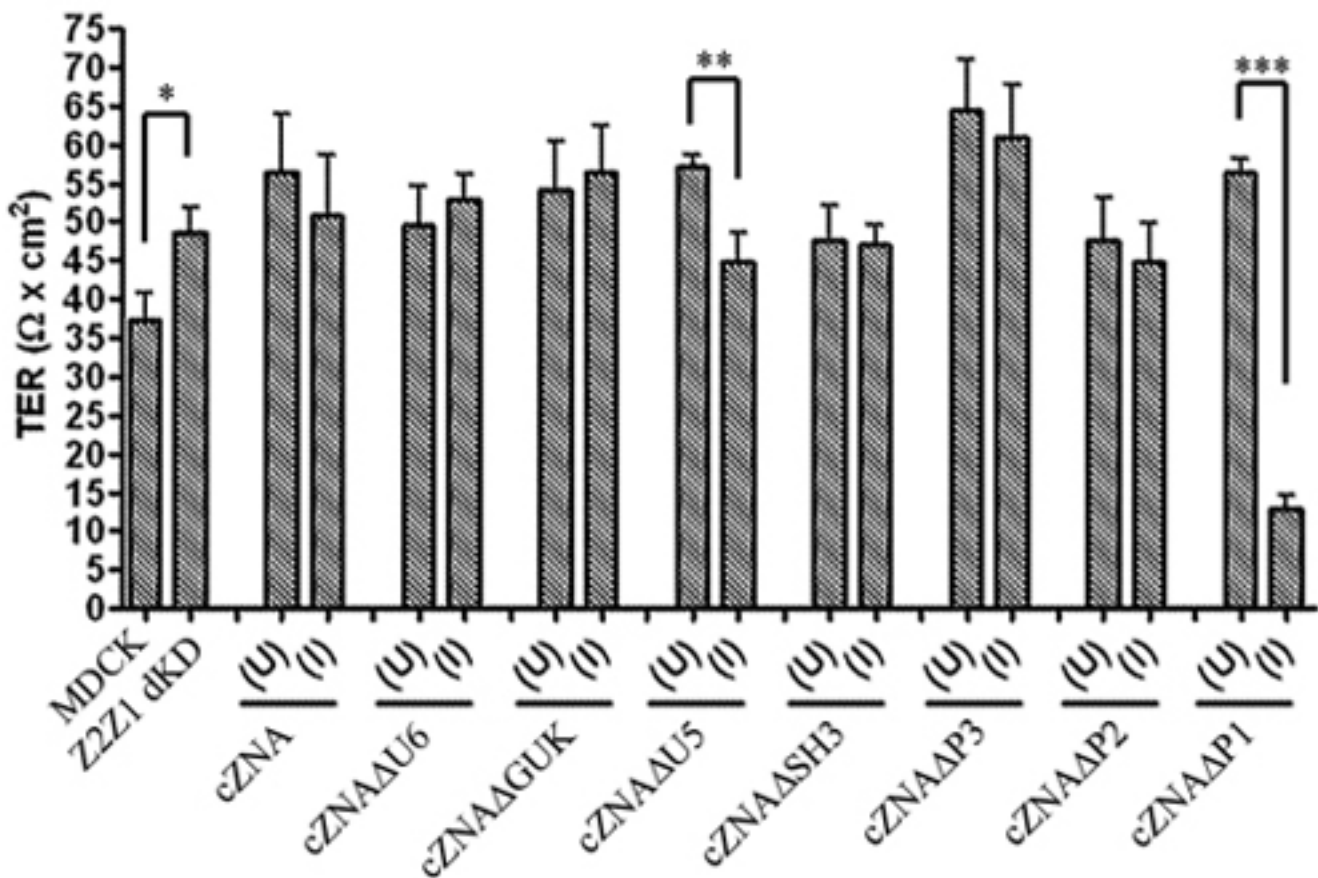

**Fig. S5. Expression of cZNA $\Delta$ P1 in ZZZ1 dKD cells significantly reduces trans-epithelial resistance (TER).** TER was measured on fully confluent cells cultured for 7 days on filters uninduced or induced to express rescue constructs. Each bar depicts one experiment that is representative of three separate experiments.  $N=4$  for each experiment. Statistics were calculated using a two-tailed unpaired Student's  $t$ -test. \* $P$ =less than 0.001, \*\* $P$ =0.006, \*\*\* $P$ =less than 0.001.

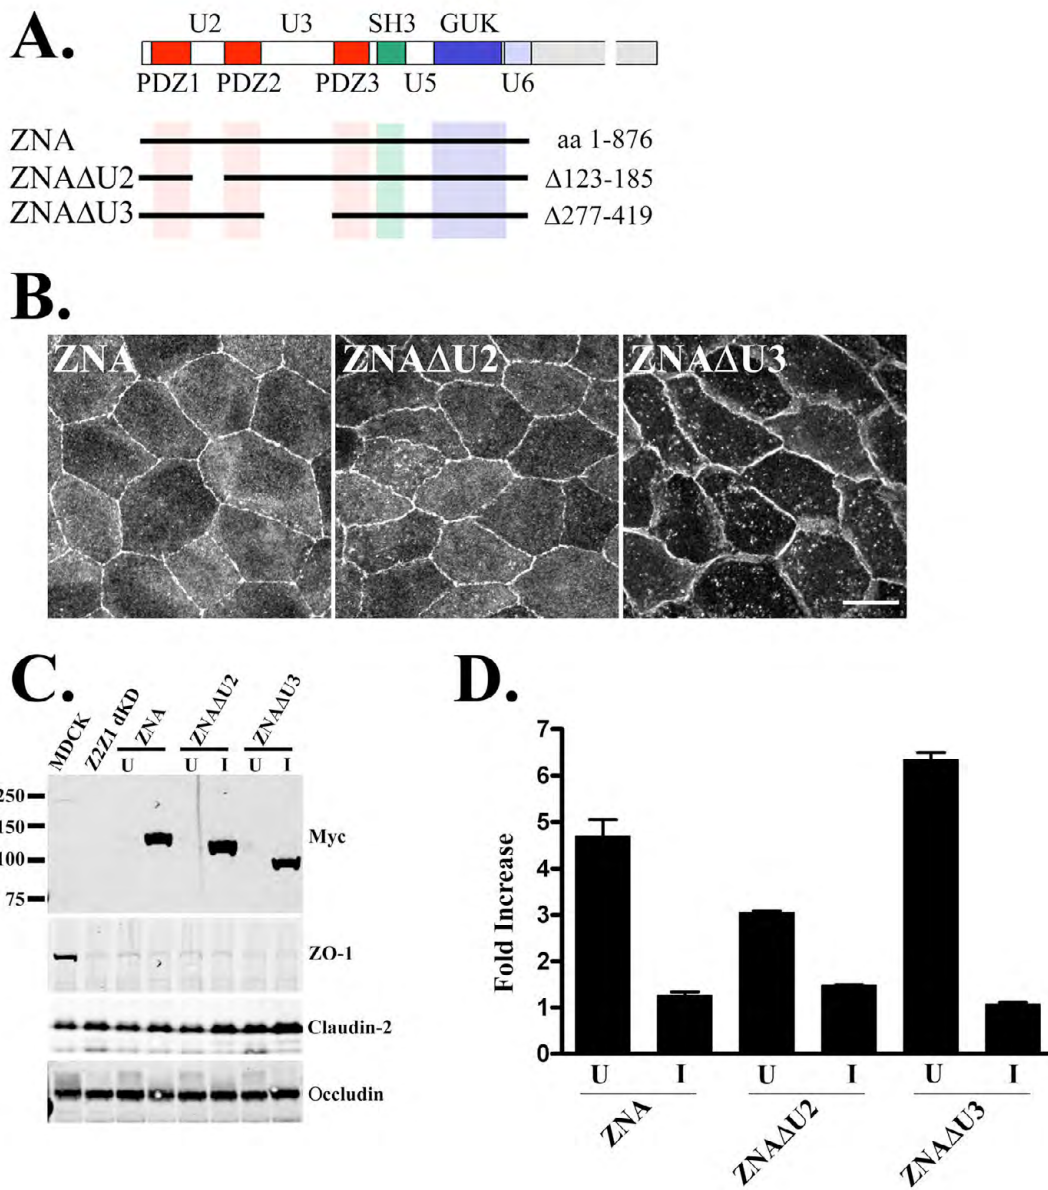

**Fig. S6. The Unique 2 (U2) and U3 motifs are not required for TJ localization or normal paracellular permeability.** (A) Schematic diagram of the ZNA  $\Delta$ U2 and  $\Delta$ U3 transgenes. All transgenes were tagged at the C-terminus with the c-myc epitope. (B) Western blot of transgene expression in control MDCK, Z2Z1 dKD, and uninduced (U) or induced (I) dKD cells stably transfected with the Tet-responsive ZNA  $\Delta$ U2 and  $\Delta$ U3 transgenes. The steady state levels of claudin-2 and occludin are not altered by transgene induction (bar: 10  $\mu$ m). (C) Cell lines expressing ZNA, ZNA  $\Delta$ U2 and  $\Delta$ U3 were grown on filters, fixed, and stained with antibodies against the myc epitope tag. Images are 1.05  $\mu$ m maximum density projections through the AJC. (D) Induction (I) of ZNA  $\Delta$ U2 and  $\Delta$ U3 can restore the flux of 3-kDa FITC-dextran to near normal levels relative to uninduced (U) or Z2Z1 dKD cells. The movement of dextran across filter-grown cells is shown as fold increase over that of control MDCK cells.

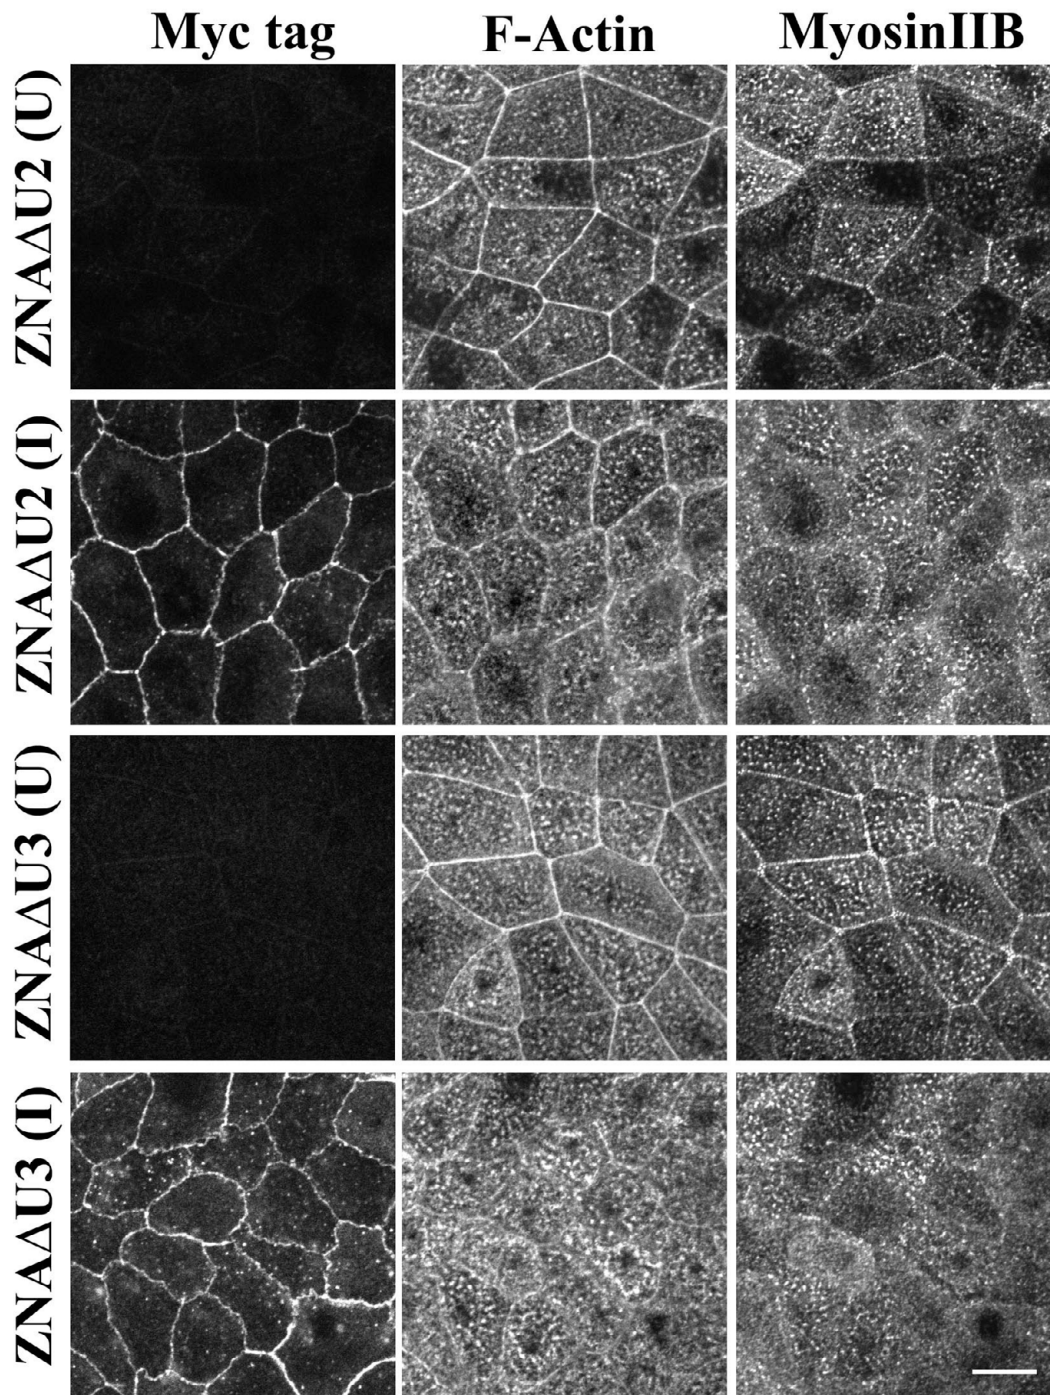

**Fig. S7. The Unique 2 (U2) and U3 motifs are not required for normal actomyosin architecture of the AJC.** MDCK, Z2Z1 or Z2Z1 cells transfected with the indicated transgene were grown on filter inserts for 7 days in presence (U=uninduced) or absence (I=Induced) of 1.0  $\mu$ g/ml doxycycline, and subsequently fixed and stained with TRITC-phalloidin and antibodies against myc and myosin IIB. Images are 1.05  $\mu$ m maximum density projections of the AJC (bar: 10  $\mu$ m).

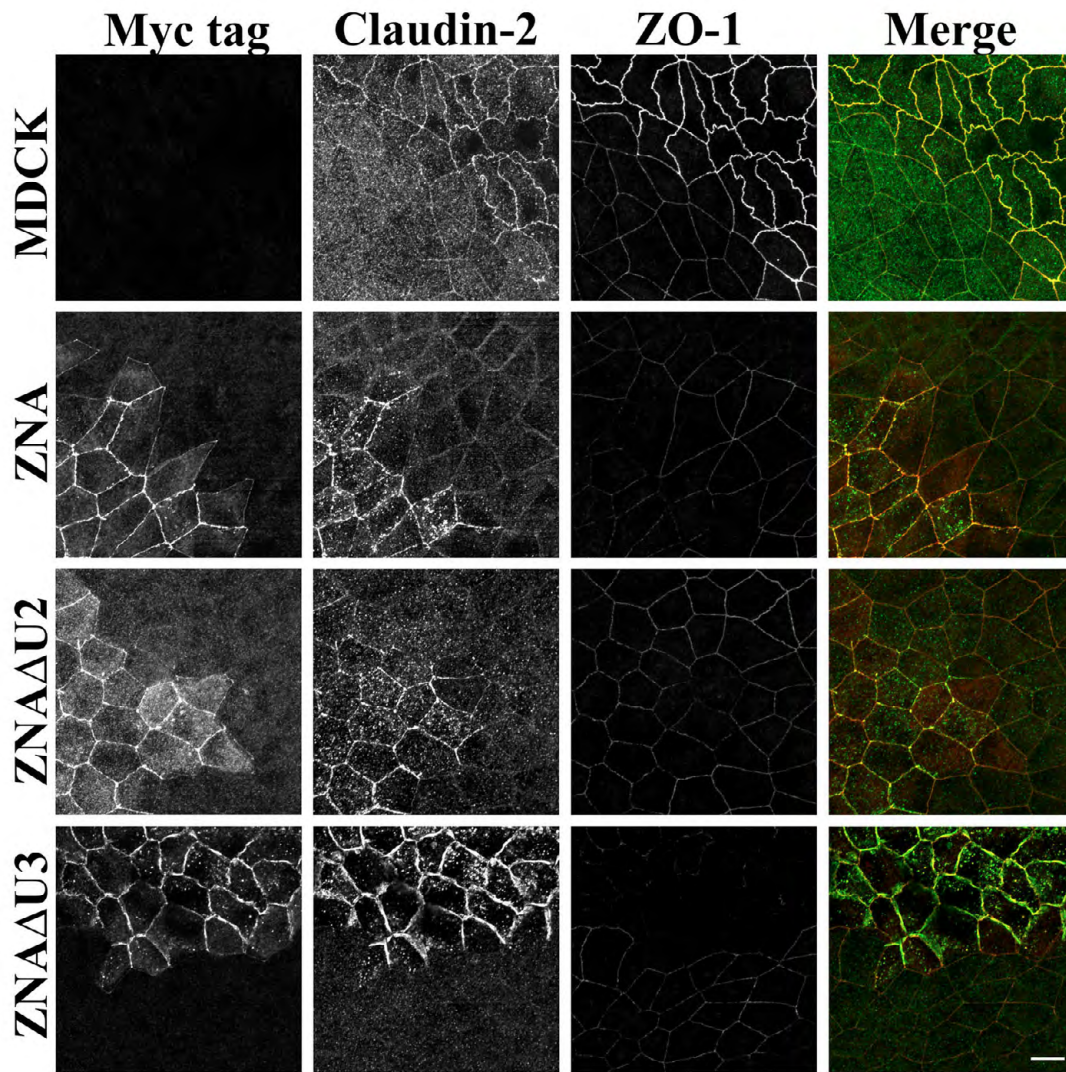

**Fig. S8. The Unique 2 (U2) and U3 motifs are not required for localization of claudin-2 to cell-cell contacts.** MDCK cells or ZZZ1dKD cells expressing ZNA, ZNA $\Delta$ U2 or  $\Delta$ U3 transgenes were mixed at a 1:5 ratio with ZO-depleted cells and grown on filter inserts for 7 days, fixed and stained with antibodies against myc, claudin-2, and the endogenous canine ZO-1. Note that claudin-2 localization to cell-cell contacts is greatly reduced in ZO-depleted ZZZ1 dKD cells relative to MDCK control cells or transgene-expressing cells on the same filter. Images are 1.75  $\mu$ m maximum density projections (bar: 10  $\mu$ m).
